## Intrinsic mechanical properties of the perfused armoured catfish heart with special reference to the effects of hypercapnic acidosis on maximum cardiac performance

Linda M. Hanson<sup>1,\*</sup>, Daniel W. Baker<sup>1</sup>, Louise J. Kuchel<sup>1,†</sup>, Anthony P. Farrell<sup>2</sup>, Adalberto L. Val<sup>3</sup>  
 and Colin J. Brauner<sup>1</sup>

<sup>1</sup>Department of Zoology, University of British Columbia, 6270 University Boulevard, Vancouver, BC, V6T 1Z4 Canada, <sup>2</sup>Faculty of Land and Food Systems and Department of Zoology, University of British Columbia, Vancouver, V6T 1Z4 Canada and <sup>3</sup>Laboratory of Ecophysiology and Molecular Evolution, Instituto Nacional de Pesquisas da Amazônia, Manaus, Brazil

\*Author for correspondence (e-mail: hanson@zoology.ubc.ca)

<sup>†</sup>Present address: School of Integrated Biology, University of Queensland, Brisbane, QLD 4072 Australia

Accepted 9 February 2009

### SUMMARY

The armoured catfish, *Pterygoplichthys pardalis*, is known to be extremely tolerant of environmental hypercarbia (elevated water CO<sub>2</sub> tensions), which occurs in their natural environment. In addition, previous studies have demonstrated that during exposure to hypercarbia, *P. pardalis* does not exhibit extracellular pH compensation and thus the heart and other organs must continue to function despite a severe extracellular acidosis. We used an *in situ* perfused heart preparation to determine the effects of an extracellular hypercapnic (elevated CO<sub>2</sub> in the animal) acidosis (1–7.5% CO<sub>2</sub>) on heart function, specifically cardiac output, power output, heart rate and stroke volume. The present study is the first to comprehensively examine cardiac function in an acidosis-tolerant teleost. When compared with control conditions, maximum cardiac performance was unaffected at levels of CO<sub>2</sub> as high as 5%, far exceeding the hypercapnic tolerance of other teleosts. Moreover, *P. pardalis* exhibited only a moderate decrease (~35%) in cardiac performance when exposed to 7.5% CO<sub>2</sub>, and full cardiac performance was restored in six out of seven hearts upon return to control conditions. Myocardial intracellular pH (pH<sub>i</sub>) was protected *in situ*, as has been found *in vivo*, and this protection extended to the highest level of CO<sub>2</sub> (7.5%) investigated. Thus, maintained heart function during a hypercapnic acidosis in *P. pardalis* is probably associated with preferential pH<sub>i</sub> regulation of the heart, but ultimately is not sufficient to prevent loss of cardiac function. Our findings suggest the need for further study to elucidate the mechanisms behind this remarkable cardiac hypercapnic tolerance.

Key words: hypercapnia, heart, carbon dioxide, intracellular pH, *Pterygoplichthys pardalis*, acid–base physiology.

### INTRODUCTION

The waters of the Amazon are prone to episodes of both hypoxia (low dissolved oxygen) (Val et al., 1995) and hypercarbia (high dissolved carbon dioxide). These events are the result of high biomass and water stratification, and occur most frequently at night; CO<sub>2</sub> tensions as high as 8 kPa have been measured under dense vegetative mats (Heisler, 1982; Ultsch, 1996), suggesting that severe hypercarbia may be a relatively common occurrence in tropical environments. CO<sub>2</sub> levels of this magnitude will induce a severe extracellular acidosis in fishes, which no fish studied to date is able to compensate for. Consequently, organs which are bathed in, and rely on, venous blood, such as the heart, must continue to function in spite of the potentially debilitating effects of an extracellular acidosis if the animal is to survive. As a result of considerable study on the inotropic (force of contraction) and chronotropic (frequency of contraction) effects of hypercapnic acidosis in both isolated cardiac muscle strips (Poupa et al., 1978; Gesser and Jorgensen, 1982; Gesser et al., 1982; Kalinin and Gesser, 2002) and working perfused heart preparations (Farrell et al., 1986; Farrell and Milligan, 1986; Farrell et al., 1988; Hanson et al., 2006), it is believed that the origin of the negative effects on both myocardial contractility and pacemaker cells is in fact intracellular acidification (Sato and Hashimoto, 1983).

Despite periodic hypercarbic challenges, a great number of teleost species thrive in the Amazon. One such species, the armoured

catfish, *Pterygoplichthys pardalis* (formerly known as *Liposarcus pardalis*), is a facultative air breather and possesses a great capacity to tolerate aquatic hypercarbia (Brauner et al., 2004). This tolerance is not related to extracellular pH (pH<sub>e</sub>) compensatory capacity as, during exposure to hypercarbia, *P. pardalis* does not compensate for the extracellular acidosis, and thus pH<sub>e</sub> can decrease from pH 7.9 to below pH 7.0 for hours or days without apparent adverse effects (Brauner et al., 2004). In most fishes studied to date, decreases in pH<sub>e</sub> are qualitatively matched by decreases in intracellular pH (pH<sub>i</sub>) in tissues such as the heart, white muscle and liver (Milligan and Farrell, 1986; Milligan and Wood, 1986; Wood and LeMoigne, 1991; Wood et al., 1990; McKenzie et al., 2002). Intriguingly, *P. pardalis* has been shown to regulate heart, liver and white muscle intracellular pH at normocarbic levels during the severe extracellular acidosis induced by hypercarbia (Brauner et al., 2004). This unusual pattern of pH<sub>i</sub> protection during severe pH<sub>e</sub> depression, which has only been observed in *P. pardalis*, *Acipenser transmontanus* (Brauner and Baker, 2009) and *Synbranchus marmoratus* (Heisler, 1982), may be the basis for CO<sub>2</sub> tolerance in fishes (Brauner and Baker, 2009) and we hypothesize here, protection of heart function in *P. pardalis*. The objective of this study was to determine the effects of a severe extracellular acidosis on maximum cardiac performance of *P. pardalis*, using an *in situ* perfused heart preparation subjected to different levels of hypercapnia. In order to appropriately examine these effects, characterization of baseline

cardiac parameters and cardiac function was necessary, as these variables have not been previously reported in this species. Of special interest was the effect of hypercapnia on heart  $pH_i$  in this *in situ* preparation, where hearts were forced to work maximally, representing a very different condition to that examined previously *in vivo* (Brauner et al., 2004). This study provides insight into the physiological basis for  $CO_2$  tolerance in fish that has recently been considered to be associated with the evolution of air-breathing (Brauner and Baker, 2009).

## MATERIALS AND METHODS

### Experimental animals

Armoured catfish (*Pterygoplichthys pardalis* Castelnau 1855) of both sexes (mass,  $473 \pm 39$  g; relative ventricular mass,  $0.028 \pm 0.002\%$ ) were obtained from a local commercial fish supplier and held in aerated well water at Instituto Nacional de Pesquisas da Amazônia (INPA), Manaus, Brazil prior to and during experimentation. Fish were maintained under a natural photoperiod in aerated outdoor tanks containing well water at  $28^\circ C$ .

### Surgical procedures

Fish were anaesthetized in an oxygenated solution of buffered tricaine methane sulfonate (MS-222,  $0.15 \text{ g l}^{-1}$ , with  $0.30 \text{ g l}^{-1}$   $NaHCO_3$ ), weighed and placed on an operating table where their gills were continuously irrigated with chilled, oxygenated anaesthetic ( $0.05 \text{ g l}^{-1}$  MS-222 buffered with  $0.1 \text{ g l}^{-1}$   $NaHCO_3$ ). Fish were then injected with  $1 \text{ ml kg}^{-1}$  of heparinized saline ( $150 \text{ i.u. ml}^{-1}$ ) into the caudal vessels. An *in situ* perfused heart preparation was prepared as previously described (Farrell et al., 1986) but modified (Farrell et al., 1989); however, further modifications were necessary because of the anatomical differences between rainbow trout and armoured catfish. A shallow lengthwise incision was made from the anal opening to an area just posterior to the pectoral girdle to expose the viscera and allow a stainless steel input cannula to be introduced into the sinus venosus *via* a hepatic vein. In armoured catfish there are two major hepatic veins, one from each lobe of the liver. These two vessels are highly visible as they exit the liver and merge to form a single vessel. This single vessel is only visible for a very short distance before it becomes enveloped by the layer of connective tissue that encloses the entrance to the pericardium. Owing to these anatomical limitations, the input cannula was always inserted into the left hepatic vein at a point just upstream (posterior) from the junction. The input cannula was advanced along the vessel to the point at which the hepatic vein joined the sinus venosus. In the ideal preparation, the tip of the input cannula was introduced fully into the sinus venosus; however, the anatomy of the junction between the two structures was such that this was not always possible. Consequently, even with careful placement, partial occlusion of the tip of the cannula by the walls of the hepatic vessel was often unavoidable, thus high input pressures ( $0.11$ – $0.25 \text{ kPa}$ ) were needed to supply adequate perfusate. The use of high perfusion pressures is not ideal; nevertheless, it provides far superior results than the only alternative, a preparation in which the integrity of the pericardium is not maintained. In addition, previous studies have used even higher perfusion pressure (Stuart et al., 1983) with no apparent ill effects.

Following insertion of the input cannula, the heart was immediately perfused with saline (composition below) containing  $500 \text{ nmol l}^{-1}$  adrenaline (adrenaline bitartrate salt; AD) and  $10 \text{ i.u.}$  sodium heparin per millilitre. A stainless steel output cannula was then secured into the ventral aorta at a point confluent with the bulbus arteriosus. This was facilitated by removal of the lower

jaw and gills. The total time to prepare the perfused heart preparation was 15–20 min. All experimental procedures complied with the policies of INPA, the University Animal Care Committee of the University of British Columbia, and the Canadian Council on Animal Care.

Following surgery, the fish was transferred to a physiological saline bath ( $7\% NaCl$ ). The input cannula was immediately connected to an adjustable, constant-pressure reservoir, and the output cannula was connected to a separate constant pressure head set at  $3.0 \text{ kPa}$ . The height of the input pressure reservoir was adjusted to set routine cardiac output ( $\dot{Q}$ ) at approximately  $35 \text{ ml min}^{-1} \text{ kg}^{-1}$ . Input ( $P_{in}$ ) and output ( $P_{out}$ ) pressure were measured through saline-filled side arms (PE50 tubing) connected to disposable pressure transducers (DPT 6100, Smiths Medical, Kirchseon, Germany). Cardiac outflow was continuously measured through the output line with an in-line electromagnetic flow probe (SWF-4, Zepeda Instruments, Seattle, WA, USA) that had been previously calibrated with known flow rates of perfusate. Hearts were allowed to equilibrate for 5–10 min under control conditions (see below) before the experiment commenced. Previous examination of *P. pardalis* ventricles revealed no evidence of a coronary circulation.

### Perfusate composition

For the control perfusate, freshwater fish saline ( $125.0 \text{ mmol l}^{-1}$   $NaCl$ ,  $3.0 \text{ mmol l}^{-1}$   $KCl$ ,  $1.0 \text{ mmol l}^{-1}$   $MgSO_4 \cdot 7H_2O$ ,  $2.5 \text{ mmol l}^{-1}$   $CaCl_2 \cdot 2H_2O$ ,  $5.6 \text{ mmol l}^{-1}$  D-glucose,  $11.9 \text{ mmol l}^{-1}$   $NaHCO_3$ ; all chemicals from Sigma-Aldrich, Oakville, ON, Canada) was aerated with  $1.0\% CO_2$  (balance air), supplied by a Wösthoff gas mixing pump (Bochum, Germany), to achieve a  $pH$  of 7.8 and an oxygen level of  $20 \text{ kPa}$ . Previous experiments in our laboratory (Hanson et al., 2006) have shown no significant difference in maximum cardiac performance between hyperoxic hearts ( $95.5\% O_2$ ,  $0.5\% CO_2$ ) and hearts perfused with air-saturated saline, which was the control level of oxygen for all experiments. For the hypercapnic test conditions the perfusate was aerated with varying levels of  $CO_2$  ( $2.5$ ,  $5.0$  and  $7.5\% CO_2$ , balance air), however, the ionic composition of the perfusate remained the same. Regardless of the test conditions, the perfusate contained  $500 \text{ nmol l}^{-1}$  AD. Preliminary studies suggested that this high level of adrenergic stimulation was necessary for the heart to maintain consistent performance. Furthermore, previous studies on cardiac strips (trout and eel) demonstrated that adrenaline increases the force of contraction during hypercapnia without altering the relative changes in force seen under different exposure conditions [anoxia, hypercapnia, recovery (Gesser et al., 1982)], thus minimizing any concerns that potentially excess adrenergic stimulation affected the results of the present study. Additionally,  $500 \text{ nmol l}^{-1}$  AD was shown not to affect  $pH_i$  during extracellular acidosis in perfused rainbow trout hearts, although contractility was restored in failing hearts (Farrell and Milligan, 1986).

### Experimental protocols

Maximum cardiac performance was assessed in each heart preparation under every test condition. By initially measuring both maximum cardiac output ( $\dot{Q}_{max}$ ) and maximum cardiac power output ( $PO_{max}$ ) under control conditions, each heart acted as its own control. To determine  $\dot{Q}_{max}$ ,  $P_{in}$  was gradually increased in increments of approximately  $0.05 \text{ kPa}$  until cardiac output reached a plateau (usually around  $0.4 \text{ kPa}$ ). To assess  $PO_{max}$ ,  $P_{in}$  was left at its maximum and  $P_{out}$  was increased in a stepwise fashion in  $\sim 0.1 \text{ kPa}$  increments until  $PO$  reached a plateau. After  $PO_{max}$  was determined,  $P_{out}$  and  $P_{in}$  were returned to resting levels and the heart was allowed

to recover (~5 min) before being exposed to the next perfusate. To mimic natural conditions all experiments were performed at  $27.0 \pm 0.2^\circ\text{C}$ .

#### Series 1: characterization of cardiac performance

The purpose of this series was to characterize the Starling response (the change in cardiac performance *versus* preload) and the pressure development of armoured catfish hearts. Following 5–10 min acclimation period to control conditions, the Starling response was determined by increasing  $P_{\text{in}}$  in 0.05 kPa increments, with the heart being allowed to equilibrate for approximately 1 min at each step.  $P_{\text{in}}$  was increased until such time as  $\dot{Q}$  reached a maximum. Immediately following this procedure maximum pressure generation was determined by increasing  $P_{\text{out}}$  in a similar stepwise fashion (with  $P_{\text{in}}$  held constant at its maximum) until  $PO$  reached a maximum. Hearts were then returned to resting levels of  $P_{\text{in}}$  and  $P_{\text{out}}$  so that their routine, post-test performance could be compared with their initial performance to assess preparation viability and ensure that the heart had not been damaged by the test.

#### Series 2: hypercapnia

The purpose of Series 2 was to quantify the effect of hypercapnia and associated acidosis on mechanical characteristics of the perfused heart in maximally stimulated hearts (i.e. presence of  $500 \text{ nmol l}^{-1}$  AD). Recovery from severe hypercapnia was assessed by re-testing hearts with control perfusate following the hypercapnic exposures. After assessing  $\dot{Q}_{\text{max}}$  as described above (i.e. control, 1%  $\text{CO}_2$ , resulting in a pH of 7.83), hearts were then sequentially subjected to: (1) 2.5%  $\text{CO}_2$  (resulting in a pH of 7.56), (2) 5.0%  $\text{CO}_2$  (resulting in a pH of 7.26), (3) 7.5%  $\text{CO}_2$  (resulting in a pH of 7.10), (4) control with a pH of 7.83 and (5) 7.5%  $\text{CO}_2$  (resulting in a pH of 7.10). Hearts were re-exposed to 7.5%  $\text{CO}_2$  during this final step so that intracellular pH ( $\text{pH}_i$ ) could be measured under these conditions. Hearts were exposed to each perfusate for a total of 15 min during which time  $\dot{Q}_{\text{max}}$ ,  $PO_{\text{max}}$ , heart rate and stroke volume were measured; this time period also ensured continued viability of the photosensitive AD. Following the sixth and final 15 min exposure the heart was rapidly excised, the ventricle was dissected out, weighed and frozen in liquid nitrogen for later measurement of  $\text{pH}_i$  as described below.

#### Series 3: hypercapnic preconditioning

The purpose of this series was to determine if the maximum cardiac performance observed during the highest level of hypercapnia (7.5%  $\text{CO}_2$  resulting in a pH of 7.10) in Series 2 was affected by the previous exposure to an intermediate level of hypercapnia. Individual hearts were subjected to the following protocol: (1) control (1%  $\text{CO}_2$ ) resulting in a pH of 7.83, (2) 7.5%  $\text{CO}_2$  resulting in a pH of 7.10, (3) control with a pH of 7.83. As in the previous experiments, maximum cardiac performance was assessed under each test condition. Following the final (15 min) step hearts were excised, ventricle removed, weighed and frozen in liquid nitrogen for later measurement of  $\text{pH}_i$  (termed recovery  $\text{pH}_i$ ) as described below.

#### Intracellular pH determination

Intracellular pH was determined on freeze clamped ventricles using the tissue homogenate technique (Pörtner et al., 1990). In brief, the method involved homogenization of ventricular tissue using a liquid nitrogen cooled mortar and pestle. Pulverized tissue was then transferred using a pre-cooled metal scoop to a pre-cooled 1.5 ml centrifuge tube. An 800  $\mu\text{l}$  aliquot of an isotonic metabolic inhibitor

solution ( $150 \text{ mmol l}^{-1}$  KCl and  $5 \text{ mmol l}^{-1}$  nitrilotriacetic acid disodium salt) was then added to the tissue, and pH of the resultant mixture was measured using a thermostated capillary pH electrode (Radiometer, BMS 2, London, Ont., Canada). Although this technique has been validated for both water breathing (blood ~0.5%  $\text{CO}_2$ ) and air breathing (blood ~3–4%  $\text{CO}_2$ ) animals, further validation (Baker et al., 2009) was provided by comparing measurements of  $\text{pH}_i$  of red blood cells separated from blood exposed to high  $\text{CO}_2$  in tonometers (between 0.5% and 10%  $\text{CO}_2$ ) using the freeze–thaw technique (Zeidler and Kim, 1977) and the metabolic inhibitor homogenate method (Pörtner et al., 1990). The high correlation between results ( $R^2=0.95$ ) indicated that the latter can be used to measure  $\text{pH}_i$  at very high  $\text{CO}_2$  tensions despite the potential for  $\text{CO}_2$  loss during tissue processing. For comparison purposes  $\text{pH}_i$  was also measured on hearts taken immediately from euthanized, uncannulated, resting control fish ( $N=6$ ), hereafter referred to as control  $\text{pH}_i$ .

#### Calculations and statistical analysis

All experimental data were collected using data acquisition software (Labview version 5.1, National Instruments, Austin, TX, USA), which allowed for real-time measurements of  $f_{\text{H}}$ ,  $P_{\text{in}}$ ,  $P_{\text{out}}$ ,  $\dot{Q}$  and  $PO$ . Statistical differences within test groups were determined by one-way repeated measures analysis of variance (ANOVA). When warranted, the Holm–Sidak procedure was used for *post-hoc* multiple comparisons. Comparisons of  $\text{pH}_i$  between test groups were made using a Students' *t*-test. Sigma Stat (3.0, SPSS, San Rafael, CA, USA) was used for all statistical analysis. For statistical comparisons,  $\alpha=0.05$  was used for determining statistical differences.

Owing to the anatomical limitations discussed above, control preloads ranged from 0.11 kPa to 0.25 kPa. Consequently, results in Fig. 1 are presented as change from routine  $P_{\text{in}}$ , where routine  $P_{\text{in}}$  is defined as the preload necessary to achieve a  $\dot{Q}$  of  $35 \text{ ml min}^{-1} \text{ kg}^{-1}$ . Preloads were normalized by fitting ( $r^2>0.98$ ) the raw data for each individual fish ( $N=6$ ) to a first order sigmoidal equation of the form  $\dot{Q}=a/\{1+e^{-[(P_{\text{in}}-\text{routine } P_{\text{in}})/b]}\}$  where  $a$  and  $b$  are coefficients derived from the fit for each individual fish. These equations were used to calculate  $\dot{Q}$  for individual fish at specific, relative preload values. Results are presented as the mean for each preload value  $\pm$  s.e.m.

## RESULTS

#### Series 1: characterization of cardiac performance

Heart rate ( $107 \pm 4 \text{ beats min}^{-1}$ ) increased 0–3  $\text{beats min}^{-1}$  during the first 0.05 kPa increase in  $P_{\text{in}}$  ( $P>0.05$ ) but no further changes in  $f_{\text{H}}$  occurred subsequent to that (data not reported). The maximum response to preload was usually produced around 0.3 kPa to 0.4 kPa above routine  $P_{\text{in}}$  and resulted in an average  $\dot{Q}_{\text{max}}$  of  $62.8 \pm 4.1 \text{ ml min}^{-1} \text{ kg}^{-1}$  (Fig. 1). Stroke volume ( $V_{\text{S}}$ ) during  $\dot{Q}_{\text{max}}$  averaged  $0.55 \pm 0.05 \text{ ml kg}^{-1}$ . Maximum cardiac power output ( $PO_{\text{max}}$ ) was reached between 3.7 kPa and 3.9 kPa and averaged  $10.31 \pm 0.53 \text{ mW g}^{-1}$  ventricle (Fig. 2).

#### Series 2: hypercapnia

When compared with cardiac performance under control conditions, there was no significant decrease in either  $\dot{Q}_{\text{max}}$  ( $67.6 \pm 3.8 \text{ ml min}^{-1} \text{ kg}^{-1}$ ) or  $PO_{\text{max}}$  ( $10.86 \pm 0.06 \text{ mW g}^{-1}$  ventricle) under levels of hypercapnia as high as 5%  $\text{CO}_2$  (Fig. 3). Conversely, exposure to 7.5%  $\text{CO}_2$  resulted in a ~35% decrease in both  $PO_{\text{max}}$  and  $\dot{Q}_{\text{max}}$ . The decrease in  $\dot{Q}_{\text{max}}$  was associated with a 20% decrease in  $f_{\text{H}}$  ( $P<0.05$ ) and a 15% decrease in  $V_{\text{S}}$ , although the decrease in  $V_{\text{S}}$  was not statistically significant (Fig. 3). Similarly, a 15–20%

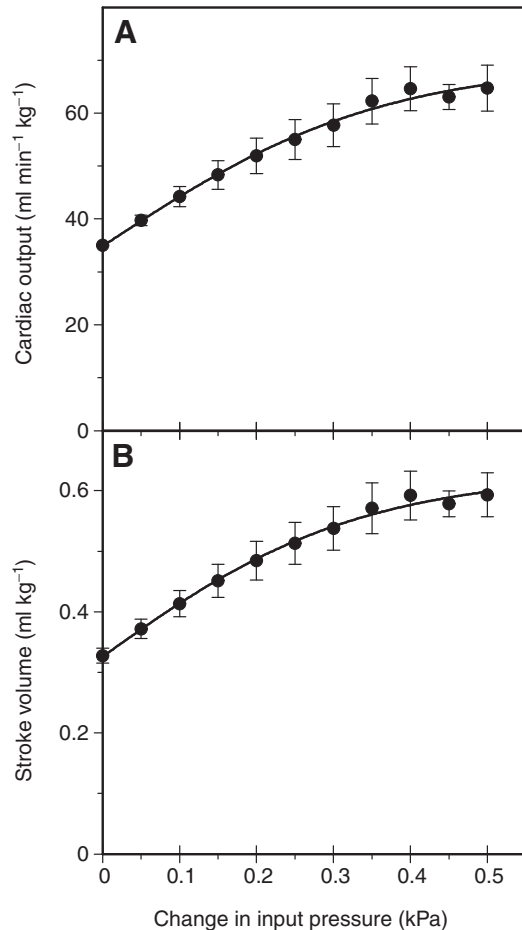

Fig. 1. The effect of changes in input pressure on cardiac output (A) and cardiac stroke volume (B) in *in situ* perfused *Pterygoplichthys pardalis* hearts under control, normocapnic conditions at  $27.0 \pm 0.2^\circ\text{C}$  ( $N=6$ ). Results are presented as change from routine preload pressure and were normalized to a first order sigmoidal equation ( $r^2 > 0.98$ ) as discussed in the Results. Data are presented as the means for each preload value  $\pm$  s.e.m.

decrease in both  $f_H$  and  $V_S$  were observed at  $PO_{\max}$  although as a result of high inter-individual variation these changes were not statistically significant (data not shown).

The effects of hypercapnia on heart function were usually not permanent as performance was restored following recovery to control conditions in all but one preparation (Fig. 3). Note that although results are only shown for five fish an additional two fish were tested under this protocol and also showed a complete recovery upon return to control conditions. Unfortunately, recordings from these two fish were lost due to equipment malfunction.

### Series 3: hypercapnic preconditioning

Hearts exposed directly to 7.5%  $\text{CO}_2$  following control perfusate showed a trend toward an additional 17–20% decrease in  $\dot{Q}_{\max}$  and  $PO_{\max}$  when compared with the cardiac performance of hearts exposed to 7.5%  $\text{CO}_2$  following a stepwise increase (Series 2). However, this difference between the two exposure methods was not statistically significant (possibly because of the small sample size,  $N=3$ ). Nevertheless, these preliminary results suggest the potential for hypercapnic preconditioning, such that a gradual (stepwise) exposure to extreme hypercapnia reduces the impact of the final hypercapnic exposure. However, confirmation of this will

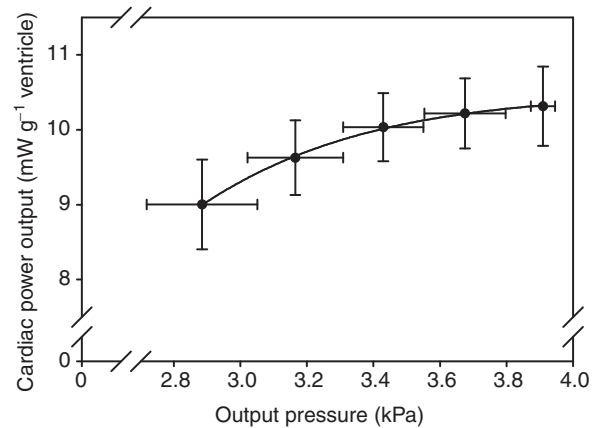

Fig. 2. The effect of changes in after-load on cardiac power output in *in situ* perfused *Pterygoplichthys pardalis* hearts under control, normocapnic conditions at  $27.0 \pm 0.2^\circ\text{C}$  ( $N=6$ ). Data are presented as means  $\pm$  s.e.m.

need further study. Similarly to Series 2, the reduction in cardiac performance seen under hypercapnia appeared to result from decreases in both  $f_H$  and  $V_S$ .

### Intracellular pH ( $\text{pH}_i$ )

Intracellular pH of hearts exposed to 7.5%  $\text{CO}_2$  (Series 2) was found to be significantly ( $P < 0.05$ ) higher than that of non-perfused control hearts ( $7.02 \pm 0.05$ ,  $N=6$  versus  $6.92 \pm 0.04$ ,  $N=6$ ). However, there was no significant difference in  $\text{pH}_i$  between hearts exposed to 7.5%  $\text{CO}_2$  compared with those sampled under normocapnic conditions (1.0%  $\text{CO}_2$ ) during hypercapnic recovery ( $7.06 \pm 0.01$ ,  $N=3$ , Series 3). In addition, regression analysis showed that myocardial  $\text{pH}_i$  under hypercapnia was negatively correlated with cardiac performance ( $\dot{Q}_{\max}$ ) under hypercapnia ( $r^2 = 0.64$ ;  $P < 0.01$ ) such that the ventricle with the lowest  $\text{pH}_i$  (i.e. closest to control values) showed the least decline in performance.

### DISCUSSION

This study demonstrates the great capacity of the heart of *P. pardalis* to both tolerate and perform maximally under a severe hypercapnic acidosis. Maximum cardiac performance was not significantly different from that seen under normocapnic conditions at levels of hypercapnia as high as 5%  $\text{CO}_2$  (5.1 kPa). Moreover, *P. pardalis* exhibited only moderate decreases (~35%) in cardiac performance when exposed to 7.5%  $\text{CO}_2$ . Equally as remarkable, full cardiac performance was restored upon return to normocapnic conditions in six out of seven preparations.

The present study is the first to comprehensively examine cardiac function in an acidosis-tolerant teleost. Previous studies looking at cardiac function in intact hearts during hypercapnic acidosis have all been conducted on species considered to be intolerant of acidosis (or sensitive to pH perturbation), i.e. rainbow trout (Farrell and Milligan, 1986; Farrell et al., 1986; Farrell et al., 1988), ocean pout (Turner and Dredzic, 1980; Farrell et al., 1983) and sea raven (Turner and Dredzic, 1980; Farrell et al., 1983). When compared with *P. pardalis* (present study) these species show significant decreases in cardiac performance (14–58%) during exposure to a far less severe hypercapnia (1–2%  $\text{CO}_2$ ; Table 1). The degree of acidosis associated with a particular  $\text{CO}_2$  tension in previous studies is not as great as in the present study (i.e. for equivalent  $\text{CO}_2$  tensions hearts in the present study are exposed to a lower pH), but this is largely due to the effect of temperature on pH ( $0.016 \text{pH}^\circ\text{C}^{-1}$ ). When ocean pout



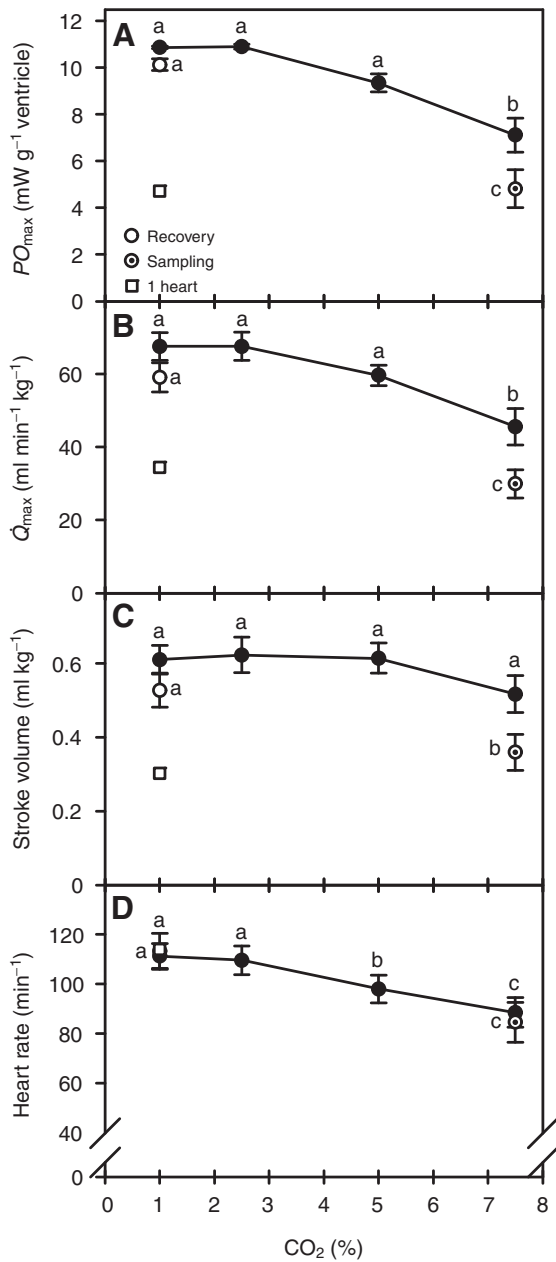

Fig. 3. The effect of hypercapnia on (A) maximum cardiac power generation,  $PO_{\max}$ , (B) maximum cardiac output,  $\dot{Q}_{\max}$ , (C) cardiac stroke volume and (D) heart rate of *in situ* perfused *Pterygoplichthys pardalis* hearts at  $27.0 \pm 0.2^\circ\text{C}$  ( $N=5$ ). Hearts were sequentially exposed to  $\text{CO}_2$  tensions of 1.0% (control), 2.5%, 5.0% and 7.5% before being returned to 1.0%  $\text{CO}_2$  to assess recovery (open circles). Hearts were then re-exposed to 7.5%  $\text{CO}_2$  to permit sampling for intracellular pH determinations (marked circles). One heart failed to recover from exposure to extreme hypercapnia and thus has been presented separately (squares).

hearts at  $10^\circ\text{C}$  were perfused with saline containing 2%  $\text{CO}_2$ , the pH of the perfusate was 7.4 and they exhibited a 20% decline in cardiac performance (Farrell et al., 1983). Conversely, performance of *P. pardalis* hearts at  $27^\circ\text{C}$  perfused with an equivalent  $\text{CO}_2$  tension but at a lower pH (pH 7.2) did not differ from normocapnic values (present study). Thus, cardiac function is clearly maintained in *P. pardalis* at  $\text{CO}_2$  tensions that greatly reduce cardiac function in seemingly acidosis-sensitive fishes.

Eels and sturgeons are known to tolerate severely hypercarbic water (10% and 3%  $\text{CO}_2$ , respectively) for short durations (several hours) with no decrease in cardiac output *in vivo* (Crocker et al., 2000; McKenzie et al., 2002). However, equivalent *in situ* studies of heart function have not been conducted for direct comparison with the present work. In addition, it is difficult to extrapolate the results of previous *in vitro* findings on isolated cardiac muscles to the present work. Nevertheless, if one assumes that isometric cardiac force generation is analogous to maximum power generation then *P. pardalis* would be slightly less acidosis tolerant than the turtle (*Trachemys scripta*, formerly *Pseudemys scripta*). *In vitro* turtle myocardium preparations showed no significant decrease in contractile force after 15–30 min at a similar level of respiratory acidosis (Poupa et al., 1978; Gesser and Jorgensen, 1982) as that which resulted in a ~35% decrease in performance in the present study. Thus, although it appears that *P. pardalis* is remarkably acidosis tolerant for a teleost, and falls within the range of the few other acidosis-tolerant vertebrates, caution should be used when comparing air and water breathers since the former have higher *in vivo* resting blood  $\text{CO}_2$  tensions and lower blood pH.

In the absence of published values for *in vivo* cardiovascular performance of *P. pardalis*, we compare our values with those reported for other teleost species and consider the effect of temperature on cardiac output ( $\dot{Q}$  increases with temperature). Given the rather sedentary nature of *P. pardalis*, maximum cardiac performance under routine (normocapnic) conditions ( $\dot{Q}_{\max}=62.8 \pm 4.1 \text{ ml min}^{-1} \text{ kg}^{-1}$ ;  $PO_{\max}=10.5 \pm 0.3 \text{ mW g}^{-1} \text{ ventricle}$ ) appears impressive compared with rainbow trout at  $18^\circ\text{C}$ , where  $\dot{Q}_{\max}$  ranges from  $54\text{--}78 \text{ ml min}^{-1} \text{ kg}^{-1}$  and  $PO_{\max}$  ranges from  $5.9\text{--}9.3 \text{ mW g}^{-1} \text{ ventricle}$  (Keen and Farrell, 1994; Farrell et al., 1996; Hanson and Farrell, 2007). Although maximum cardiac power output of *P. pardalis* under normocapnic conditions was comparable to that seen in rainbow trout, the maximum pressure generation was not ( $\sim 4 \text{ kPa}$  versus  $6\text{--}8 \text{ kPa}$ ). This suggests that *P. pardalis* probably possesses a much lower arterial blood pressure. Maximum  $V_S$  of *P. pardalis* ( $0.55 \pm 0.05 \text{ ml kg}^{-1}$ ) is also lower than that of other teleosts where  $V_S$  ranges from  $0.8\text{--}1.1 \text{ ml kg}^{-1}$  (Farrell et al., 1986; Mendonça et al., 2007), as is its relative ventricular mass ( $0.03\%$  versus  $\sim 0.07\%$  in salmonids). If  $V_S$  is expressed per gram of ventricle ( $2.09 \pm 0.10 \text{ ml g}^{-1} \text{ ventricle}$ ), it is similar to that found in another benthic species, winter flounder ( $2.3 \text{ ml g}^{-1} \text{ ventricle}$ ) and greater than that of more active species [rainbow trout  $\sim 1.2 \text{ ml g}^{-1} \text{ ventricle}$  (Farrell et al., 1986); Atlantic salmon,  $1.4 \text{ ml g}^{-1} \text{ ventricle}$ , Atlantic cod,  $1.7 \text{ ml g}^{-1} \text{ ventricle}$  (Mendonça et al., 2007)]. In addition to the present results, a previous study (Mendonça et al., 2007) suggests that winter flounder also has a comparatively low arterial blood pressure. These sorts of comparisons lend some support to the possibility that higher relative ventricular mass in active fishes is more important for pressure generation than for control of stroke volume (Gamperl and Farrell, 2004). Our heart rates ( $\sim 110 \text{ min}^{-1}$ ) are higher than those recorded previously ( $76 \text{ min}^{-1}$ ) in resting individuals of this species (MacCormack et al., 2003a). We attribute the majority of this discrepancy to the removal of vagal cholinergic tone in the present experiment. Previous studies have found cholinergic tone to be exceptionally high in air breathing fishes (Sundin et al., 1999; McKenzie et al., 2007) and thus the removal of cholinergic control can have dramatic effects on heart rate. For example, administration of a cholinergic antagonist caused heart rate to nearly triple in the facultative air breathing jeju (*Hoplerythrinus unitaeniatus*) (McKenzie et al., 2007). An additional explanation is that some of the increase in heart rate may be due to adrenergic stimulation. Tonic catecholamine concentrations are

Table 1. The effect of hypercapnia on *in situ* and *in vitro* cardiac performance in fish

| Species                          | Temp<br>(°C) | $\Delta\text{CO}_2$ | Perfusate<br>pH <sup>†</sup> | Percent change from control                            |                                                                       |                                                 |                                       | Reference                                     |
|----------------------------------|--------------|---------------------|------------------------------|--------------------------------------------------------|-----------------------------------------------------------------------|-------------------------------------------------|---------------------------------------|-----------------------------------------------|
|                                  |              |                     |                              | $PO_{\text{max}}$<br>(mW g <sup>-1</sup><br>ventricle) | $\dot{Q}_{\text{max}}$<br>(ml min <sup>-1</sup><br>kg <sup>-1</sup> ) | $f_{\text{H}}$<br>(beats<br>min <sup>-1</sup> ) | $V_{\text{S}}$<br>ml kg <sup>-1</sup> |                                               |
| <i>Pterygoplichthys pardalis</i> | 27           | +1.5%               | 7.56                         | 0                                                      | 0                                                                     | -2                                              | 0                                     | Present study ( <i>in situ</i> )              |
|                                  |              | +4.0%               | 7.23                         | -14                                                    | -12                                                                   | -12                                             | 0                                     |                                               |
|                                  |              | +6.0%               | 7.10                         | -35                                                    | -33                                                                   | -21                                             | -15                                   |                                               |
| <i>Oncorhynchus mykiss</i>       | 10           | +1.3%               | 7.4                          | -12                                                    | -8                                                                    | -11                                             | 0                                     | Farrell et al., 1986 ( <i>in situ</i> )       |
| <i>Hemipterus americanus</i>     | 10           | +1.5%               | 7.4                          | -14                                                    | -12                                                                   | -8                                              | -2                                    | Farrell et al., 1983 ( <i>in situ</i> )       |
| <i>Macrozoarces americanus</i>   | 10           | +1.5%               | 7.4                          | -20                                                    | -18                                                                   | -10                                             | -10                                   | Farrell et al., 1983 ( <i>in situ</i> )       |
| <i>Hemipterus americanus</i> *   | 10           | +1.0%               | 6.8–7.0                      | -50                                                    | –                                                                     | Paced                                           | –                                     | Turner and Driedzic, 1980 ( <i>in vitro</i> ) |
| <i>Macrozoarces americanus</i> * | 10           | +1.0%               | 6.8–7.0                      | -58                                                    | –                                                                     | Paced                                           | –                                     | Turner and Driedzic, 1980 ( <i>in vitro</i> ) |

\*Values reached after 15 minutes of exposure to hypercapnia, no adrenaline in perfusate.

<sup>†</sup>Initial pH ranged from 7.8–7.9 between studies, initial CO<sub>2</sub> was between 0%–1%.

$f_{\text{H}}$ , heart rate;  $PO_{\text{max}}$ , maximum cardiac power output;  $\dot{Q}_{\text{max}}$ , maximum cardiac output;  $V_{\text{S}}$ , stroke volume.

currently unknown for *P. pardalis* and thus preliminary experiments were conducted to determine the appropriate level of adrenergic stimulation. These experiments revealed that high levels of adrenaline (500 nmol l<sup>-1</sup>) were necessary to ensure a stable preparation.

When perfused hearts were exposed to the most severe hypercapnia (7.6 kPa; 7.5% CO<sub>2</sub>) both  $\dot{Q}_{\text{max}}$  and  $PO_{\text{max}}$  decreased by ~35%. The reduction in both measures of cardiac performance appears to be mainly due to hypercapnic bradycardia (23 beats min<sup>-1</sup> at  $\dot{Q}_{\text{max}}$  and 19 beats min<sup>-1</sup> at  $PO_{\text{max}}$ ), although in the case of  $PO_{\text{max}}$  the ~20% reduction in  $f_{\text{H}}$  (19 beats min<sup>-1</sup>) was not statistically significant. A similar degree of hypercapnic bradycardia has been well documented in other species (Farrell et al., 1983; Farrell et al., 1986; McKendry and Perry, 2001). The current study used CO<sub>2</sub> aeration to induce an extracellular acidosis, however, the acidosis did not manifest intracellularly. This suggests that preferential regulation of myocardial pH<sub>i</sub> is occurring in this *in situ* preparation, as CO<sub>2</sub> tensions within the myocardium are expected to equilibrate with the perfusate quite rapidly (Gesser and Jorgensen, 1982). Previous studies on the CO<sub>2</sub>-sensitive rainbow trout demonstrated that during a hypercapnic acidosis both *in vivo* and *in situ* myocardial pH<sub>i</sub> fell within 3 h (Farrell and Milligan, 1986; Wood and LeMoigne, 1991).

Interestingly, in *P. pardalis* myocardial pH<sub>i</sub> is regulated both *in situ* (present study) and *in vivo* (Brauner et al., 2004). Robust tissue pH regulation has been identified in only a few other fishes, for example, the white sturgeon, *Acipenser transmontanus* (Brauner and Baker, 2009), and the facultative air breather, the marbled swamp eel, *Synbranchus marmoratus* (Heisler, 1982). In both of these species, intrinsic buffering was not great enough to account for pH<sub>i</sub> protection, and therefore, active cellular pH regulation was hypothesized to be driving pH<sub>i</sub> compensation. Trans-membrane cellular pH<sub>i</sub> regulation capacity could explain the incongruity between the findings in rainbow trout and the armoured catfish. Elucidation of these mechanisms will have to await further study.

This study is the first to comprehensively examine cardiac function in a CO<sub>2</sub>-tolerant teleost. Our results reveal that the heart of *P. pardalis* possesses a remarkable ability to both tolerate and perform maximally in the face of a severe hypercapnic acidosis; a situation that freshwater tropical fish may experience in their natural environment (Ultsch, 1996), and a condition that also occurs when a facultative air-breathing fish breathes air during exposure to hypoxia (Heisler, 1982). Our results also imply a role for pH<sub>i</sub> protection in maintaining heart function at high CO<sub>2</sub> tensions,

consistent with our hypothesis that CO<sub>2</sub> tolerance in fishes is associated with preferential pH<sub>i</sub> regulation; although this regulation is not sufficient to ultimately prevent loss of cardiac function. Recent studies have suggested that *P. pardalis* is better able to regulate myocardial intracellular calcium (MacCormack et al., 2003b) than more acidosis-sensitive species. Intracellular calcium levels and myofilament calcium sensitivity play a vital role in determining myocardial contractility. In addition, the positive inotropic effects of intracellular calcium are thought to counteract the negative inotropic effects of hypercapnic acidosis. Consequently, intracellular calcium handling has been implicated in the restoration of force and contractility during hypercapnic acidosis, however, little is currently known about the mechanistic basis for this. If improved intracellular Ca<sup>2+</sup> handling is involved in alleviating the effects of hypercapnia, future exploration of this topic may reveal the mechanisms responsible for the remarkable hypercapnic tolerance of *P. pardalis*.

#### List of abbreviations

|                        |                              |
|------------------------|------------------------------|
| AD                     | adrenaline                   |
| $f_{\text{H}}$         | heart rate                   |
| pH <sub>e</sub>        | extracellular pH             |
| pH <sub>i</sub>        | intracellular pH             |
| $P_{\text{in}}$        | input pressure               |
| $P_{\text{out}}$       | output pressure              |
| $PO$                   | cardiac power output         |
| $PO_{\text{max}}$      | maximum cardiac power output |
| $\dot{Q}$              | cardiac output               |
| $\dot{Q}_{\text{max}}$ | maximum cardiac output       |
| $V_{\text{S}}$         | stroke volume                |

This research was supported by Natural Sciences and Engineering Research Council (NSERC) of Canada Discovery grants to C.J.B. and A.P.F., a CNPq Brazil research grant to A.L.V. and NSERC CGS, CSZ Research Travel Award and SEB COB Research Travel Grant to D.B. We thank Drs M. Axelsson and J. Altimiras for writing and providing the perfused heart data acquisition and analysis program for Labview, D. Jackson for valuable technical assistance, and Nazaré Paula da Silva for tremendous logistical support during our stay.

#### REFERENCES

- Baker, D. W., May, C. and Brauner, C. J. (2009). A validation of intracellular pH measurements in fish exposed to hypercarbia: the effect of duration of tissue storage and efficacy of the metabolic inhibitor tissue homogenate method. *J. Fish Biol.* in press.
- Brauner, C. J. and Baker, D. (2009). Patterns of acid-base regulation in fish. In *Cardio-Respiratory Control in Vertebrates: Comparative and Evolutionary Aspects* (ed. M. L. Glass and S. C. Wood). Berlin: Springer-Verlag.
- Brauner, C. J., Wang, T., Wang, Y., Richards, J. G., Gonzalez, R. J., Bernier, N. J., Xi, W., Patrick, A. and Val, A. L. (2004). Limited extracellular but complete intracellular acid-base regulation during short-term environmental hypercapnia in the armoured catfish, *Liposarcus pardalis*. *J. Exp. Biol.* **207**, 3381–3390.

- Crocker, C. E., Farrell, A. P., Gamperl, A. K. and Cech, J. J. (2000). Cardiorespiratory responses of white sturgeon to environmental hypercapnia. *Am. J. Physiol. Regul. Integr. Comp. Physiol.* **279**, R617-R628.
- Farrell, A. P. and Milligan, C. L. (1986). Myocardial intracellular pH in a perfused rainbow trout heart during extracellular acidosis in the presence and absence of adrenaline. *J. Exp. Biol.* **125**, 347-359.
- Farrell, A. P., MacLeod, K. R., Driedzic, W. R. and Wood, S. (1983). Cardiac performance in the *in situ* perfused fish heart during extracellular acidosis: interactive effects of adrenaline. *J. Exp. Biol.* **107**, 415-429.
- Farrell, A. P., MacLeod, K. R. and Chancey, B. (1986). Intrinsic mechanical properties of the perfused rainbow trout heart and the effects of catecholamines and extracellular calcium under control and acidotic conditions. *J. Exp. Biol.* **125**, 319-345.
- Farrell, A. P., Macleod, K. R. and Scott, C. (1988). Cardiac performance of the trout (*Salmo gairdneri*) heart during acidosis: effects of low bicarbonate, lactate and cortisol. *Comp. Biochem. Physiol.* **91A**, 271-277.
- Farrell, A. P., Small, S. and Graham, M. S. (1989). Effect of heart rate and hypoxia on the performance of a perfused trout heart. *Can. J. Zool.* **67**, 274-280.
- Farrell, A. P., Gamperl, A. K., Hicks, J. M. T., Shiels, H. A. and Jain, K. E. (1996). Maximum cardiac performance of rainbow trout (*Oncorhynchus mykiss*) at temperatures approaching their upper lethal limit. *J. Exp. Biol.* **199**, 663-672.
- Gamperl, A. K. and Farrell, A. P. (2004). Cardiac plasticity in fishes: environmental influences and intraspecific differences. *J. Exp. Biol.* **207**, 2537-2550.
- Gesser, H. and Jorgensen, E. (1982). pH<sub>i</sub>, contractility and Ca<sup>2+</sup> balance under hypercapnic acidosis in the myocardium of different vertebrate species. *J. Exp. Biol.* **96**, 405-412.
- Gesser, H., Andresen, P., Brams, P. and Sundlaursen, J. (1982). Inotropic effects of adrenaline on the anoxic or hypercapnic myocardium of rainbow trout and eel. *J. Comp. Physiol.* **147**, 123-128.
- Hanson, L. M. and Farrell, A. P. (2007). The hypoxic threshold for maximum cardiac performance in rainbow trout *Oncorhynchus mykiss* (Walbaum) during simulated exercise conditions at 18°C. *J. Fish Biol.* **71**, 926-932.
- Hanson, L. M., Obradovich, S., Mouniargi, J. and Farrell, A. P. (2006). The role of adrenergic stimulation in maintaining maximum cardiac performance in rainbow trout (*Oncorhynchus mykiss*) during hypoxia, hyperkalemia and acidosis at 10°C. *J. Exp. Biol.* **209**, 2442-2451.
- Heisler, N. (1982). Intracellular and extracellular acid-base regulation in the tropical fresh-water teleost fish *Synbranchus marmoratus* in response to the transition from water breathing to air breathing. *J. Exp. Biol.* **99**, 9-28.
- Kalinin, A. and Gesser, H. (2002). Oxygen consumption and force development in turtle and trout cardiac muscle during acidosis and high extracellular potassium. *J. Comp. Physiol.* **172B**, 145-151.
- Keen, J. E. and Farrell, A. P. (1994). Maximum prolonged swimming speed and maximum cardiac performance of rainbow trout, *Oncorhynchus mykiss*, acclimated to two different water temperatures. *Comp. Biochem. Physiol.* **108A**, 287-295.
- MacCormack, T. J., McKinley, R. S., Roubach, R., Almeida-Val, V. M. F., Val, A. L. and Driedzic, W. R. (2003a). Changes in ventilation, metabolism, and behaviour, but not bradycardia, contribute to hypoxia survival in two species of Amazonian armoured catfish. *Can. J. Zool.* **81**, 272-280.
- MacCormack, T. J., Treberg, J. R., Almeida-Val, V. M. F., Val, A. L. and Driedzic, W. R. (2003b). Mitochondrial K<sub>ATP</sub> channels and sarcoplasmic reticulum influence cardiac force development under anoxia in the Amazonian armored catfish *Liposarcus pardalis*. *Comp. Biochem. Physiol.* **134A**, 441-448.
- McKendry, J. E. and Perry, S. F. (2001). Cardiovascular effects of hypercarbia in rainbow trout (*Oncorhynchus mykiss*): a role for externally oriented chemoreceptors. *J. Exp. Biol.* **204**, 115-125.
- McKenzie, D. J., Taylor, E. W., Dalla Valle, A. Z. and Steffensen, J. F. (2002). Tolerance of acute hypercapnic acidosis by the European eel (*Anguilla anguilla*). *J. Comp. Physiol.* **172B**, 339-346.
- McKenzie, D. J., Campbell, H. A., Taylor, E. W., Micheli, M., Rantin, F. T. and Abe, A. S. (2007). The autonomic control and functional significance of the changes in heart rate associated with air breathing in the jeju, *Hoplerythrinus unitaeniatus*. *J. Exp. Biol.* **210**, 4224-4232.
- Mendonça, P. C., Genge, A. G., Deitch, E. J. and Gamperl, A. K. (2007). Mechanisms responsible for the enhanced pumping capacity of the *in situ* winter flounder heart (*Pseudopleuronectes americanus*). *Am. J. Physiol. Regul. Integr. Comp. Physiol.* **293**, R2112-R2119.
- Milligan, C. L. and Farrell, A. P. (1986). Extracellular and intracellular acid-base status following strenuous activity in the sea raven (*Hemirhamphus intermedius*). *J. Comp. Physiol. B* **156**, 583-590.
- Milligan, C. L. and Wood, C. M. (1986). Intracellular and extracellular acid-base status and H<sup>+</sup> exchange with the environment after exhaustive exercise in the rainbow trout. *J. Exp. Biol.* **123**, 93-121.
- Pörtner, H. O., Boutilier, R. G., Tang, Y. and Toews, D. P. (1990). Determination of intracellular pH and pCO<sub>2</sub> after metabolic inhibition by fluoride and nitrotriacetic acid. *Respir. Physiol.* **81**, 255-274.
- Poupa, O., Gesser, H. and Johansen, K. (1978). Myocardial inotropy of CO<sub>2</sub> in water- and air-breathing vertebrates. *Am. J. Physiol.* **234**, R155-R157.
- Satoh, H. and Hashimoto, K. (1983). Effect of pH on the sino-atrial node cells and atrial muscle of dog. *Arch. Int. Pharmacodyn. Ther.* **261**, 67-78.
- Stuart, R. E., Hedtke, J. L. and Weber, L. J. (1983). Physiological and pharmacological investigation of the nonvascularized marine teleost heart with adrenergic and cholinergic agents. *Can. J. Zool.* **61**, 1944-1948.
- Sundin, L., Reid, S. G., Kalinin, A. L., Rantin, F. T. and Milsom, W. K. (1999). Cardiovascular and respiratory reflexes: the tropical fish, traíra (*Hoplias malabaricus*) O<sub>2</sub> chemoresponses. *Respir. Physiol.* **116**, 181-199.
- Turner, J. D. and Driedzic, W. R. (1980). Mechanical and metabolic response of the perfused isolated fish heart to anoxia and acidosis. *Can. J. Zool.* **58**, 886-889.
- Uitsch, G. R. (1996). Gas exchange, hypercarbia and acid-base balance, paleoecology, and the evolutionary transition from water-breathing to air-breathing among vertebrates. *Palaeogeogr. Palaeoclimatol. Palaeoecol.* **123**, 1-27.
- Val, A. L. and Almeida-Val, V. M. F. (1995). *Fishes of the Amazon and Their Environment: Physiological and Biochemical Aspects*. Berlin: Springer-Verlag.
- Wood, C. M. and LeMoigne, J. (1991). Intracellular acid-base responses to environmental hyperoxia and normoxic recovery in rainbow trout. *Respir. Physiol.* **86**, 91-113.
- Wood, C. M., Turner, J. D., Munger, R. S. and Graham, M. S. (1990). The control of ventilation during hypercapnia in the skate (*Raja ocellata*). II. Cerebrospinal fluid chemistry and intracellular pH in the brain and other tissue. *Respir. Physiol.* **80**, 279-297.
- Zeidler, R. and Kim, D. H. (1977). Preferential hemolysis of postnatal calf red cells induced by internal alkalization. *J. Gen. Physiol.* **70**, 385-401.
